# Supplementary material for: A novel compound heterozygous variant identified in GLDC gene in a Chinese family with non-ketotic hyperglycinemia
Source: BMC Med Genet. 2018 Jan 5;19:5. doi: 10.1186/s12881-017-0517-1 (PMC5755286; doi:10.1186/s12881-017-0517-1)
Supplement: Supplementary file 1 — List of the primers used for Sanger sequencing and Q-PCR (DOCX 13 kb) [file 12881_2017_517_MOESM1_ESM.docx]

**Additional file 1: Table 1. List of the primers used for Sanger sequencing and Q-PCR**

| Gene | Exon | Forward Sequence (F) |
| --- | --- | --- |
| Reverse Sequence (R) |
| *GLDC*(Sanger) | exon 1 | F: AAACGACGGCCAGTGGGACTCCACGG |
| R: AACAGCTATGACCGCACGAGGACCA |
| exon 2 | F: AACGACGGCCAGTGTAGTCGCAAAACA |
| R: AACAGCTATGACCTAATCCACACATT |
| exon 3 | F: AACGACGGCCAGTTTAGTGTTGGTTGG |
| R: AACAGCTATGACCGTGGGTGTCAGTGT |
| exon 4 | F: AACGACGGCCAGTCCCAAACAAAGG |
| R: GCTATGACCTGTTGAGTTTTTCAGTTT |
| exon 5 | F: AAACGACGGCCAGTGTGCTTAGACTTA |
| R: ACAGCTATGACCCTGTTTCAGATT |
| exon 6-7 | F: AACGACGGCCAGTTGACAGGAAA |
| R: CAGCTATGACCGCGTCCATCAATCT |
| exon 8 | F: AACGACGGCCAGTTGCTGTGATTATC |
| R: AAACAGCTATGACCAGGTGGTGAATAAAT |
| exon 9 | F: ACGACGGCCAGTTGTTTTGTCGCTG |
| R: AAACAGCTATGACCTTCCTCGTTTCTCA |
| exon 10 | F: ACGACGGCCAGTTACACCAAAATACACGC |
| R: ACAGCTATGACCGTCTAAAAGAAAG |
| exon 11 | F: ACGACGGCCAGTTCTCCCCTTTGA |
| R: AACAGCTATGACCCCCTTCTCCCTCA |
| exon 12 | F: AACGACGGCCAGTAGGATTGAGCCCA |
| R: ACAGCTATGACCGCTGAGCCAGAATA |
| exon 13-14 | F: ACGACGGCCAGTCTCATACCCACA |
| R: AACAGCTATGACCGATAGAAAGGCATAA |
| exon 15 | F: AACGACGGCCAGTACAACTATGTCCC |
| R: AAACAGCTATGACCCAAGTCACAGAAT |
| exon 16 | F: ACGACGGCCAGTCTGGATGCTGTTGC |
| R: AACAGCTATGACCAGGCTTGGAGGGA |
| exon 17 | F: ACGACGGCCAGTTCAGCCTAAATAA |
| R: AACAGCTATGACCATAATCCATCA |
| exon 18 | F: AACGACGGCCAGTTTTGTGAAGGGAGT |
| R: AAACAGCTATGACCGTCCCCCAAGTAA |
| exon 19 | F: AAACGACGGCCAGTTGCCTGCTTTTC |
| R: AAACAGCTATGACCACCCATTTTGCTGC |
| exon 20 | F: AACGACGGCCAGTCTCTGCTAAGAAC |
| R: AAACAGCTATGACCCACTCTGAGAACCC |
| exon 21 | F: ACGACGGCCAGTGTGGAGTTTATCTG |
| R: AAACAGCTATGACCTATGTGCTAAGAAATAGA |
| exon 22 | F: AACGACGGCCAGTTTGGTCCTCGCTG |
| R: AACAGCTATGACCAGTCATAAGCAAACTTT |
| exon 23 | F: AAACGACGGCCAGTTCTGATGATTTTCTTA |
| R: CAGCTATGACCAGTTGAGAGTTCGGG |
| exon 24 | F: GCCAGTGAAGATTGACGGTTGA |
| R: AAACAGCTATGACCCTGTGGTTGATACTG |
| exon 25 | F: TGGTAATGTAGGG |
| R: GATGTAACAATGGC |
| *AMT*(Sanger) | exon 1-2 | F: AACGACGGCCAGTTCTGGAGACAGGG |
| R: AAACAGCTATGACCGTGTCAGCCCTGGAA |
| exon3 | F: AAACGACGGCCAGTGTCAGGAAATCAGA |
| R: AACAGCTATGACCGAGCAGAAATAAA |
| exon 4 | F: AACGACGGCCAGTAAGCCAAAACGC |
| R: AAACAGCTATGACCGTAATCCCCCAC |
| exon 5-7 | F: AACGACGGCCAGTCAGAACTGGGCTTG |
| R: AACAGCTATGACCGAAGGCTTCAGGCTA |
| exon 8-9 | F: ACGACGGCCAGTCAGGGGATAGGAGGTG |
| R: AACAGCTATGACCCATTGGGTTGGCAT |
| *GCSH*(Sanger) | exon 1 | F: CGACGGCCAGTCCAGTCAGGCTCTG |
| R: AACAGCTATGACCGGGTCCTCCCGCTA |
| exon 2 | F: AACGACGGCCAGTAGTGTCAACAGGTC |
| R: AACAGCTATGACCGTAGAGATAAAGCAA |
| exon 3 | F: ACGACGGCCAGTAAACTCAAGAATGTAG |
| R: AACAGCTATGACCGGTGACAAAGCAA |
| exon 4 | F: AACGACGGCCAGTCAGAGCGAGACTC |
| R: ACAGCTATGACCAAGAAGTAGAAAAAGAT |
| exon 5 | F: ACGACGGCCAGTTCCCCTTCTCGGGTT |
| R: ACAGCTATGACCCTACTTGGAAATAACTTTTGG |
| *GLDC*(Q-PCR) | exon 3  -Target 1 | F: ATGTATTTCTCAGTT |
| R: GGAGGTGGGTGTCA |
| exon 3  -Target 2 | F: TAAATACTCAAACAAA |
| R: AAAAAGAGAAATGTT |
| *TERT*(Q-PCR reference gene) |  | F: GTTCAGGGCACACGATTGGT |
| R: CTGGCCTCCTTTGCGATC |
